# Supplementary material for: A revolutionizing polymeric framework with integrated aluminium fragment for superior water decontamination empowered by a statistical modeling approach
Source: Royal Society of Chemistry journal article supplement (doi:10.1039/d5ta01229e), 2025-01-01
Supplement: d5ta01229e1.pdf [file d5ta01229e1.pdf]

## **Supplementary document**

### **Revolutionizing polymeric framework with integrated aluminium fragment for superior water decontamination empowered by statistical modeling approach**

**Shraddha Shukla<sup>†a</sup>, Anil R. Gupta<sup>a†</sup>, Surjit Ratnakar<sup>b</sup>, Biswajit Ganguly<sup>b†</sup>, Pankaj D. Indurkar<sup>a†\*</sup>, Saroj Sharma<sup>a†\*</sup>**

<sup>a</sup>Membrane Science & Separation Technology Division, CSIR-Central Salt & Marine Chemicals Research Institute, G. B. Marg, Bhavnagar-364002, Gujarat, India.

<sup>b</sup>Analytical And Environmental Science Division And Centralized Instrument Facility, CSIR-Central Salt & Marine Chemicals Research Institute, G. B. Marg, Bhavnagar-364002, Gujarat, India.

<sup>†</sup>Academy of Scientific and Innovative Research (AcSIR), Ghaziabad-201002, India.

\*E-mail: [sarojs@csmcri.res.in](mailto:sarojs@csmcri.res.in); [saroj.sharma23@gmail.com](mailto:saroj.sharma23@gmail.com), Tel: +91-278-2567700

#### **S1. Analytical measurements and methods for analysis**

The physicochemical properties of pAITMA were investigated using a variety of measurement techniques. Various instrumentation techniques were used to investigate the physicochemical properties of p[AITMA]. XRD instrument (Empyrean-PANalytical) equipped with Cu K radiation (wavelength: 1.54 Å). Phase identification and indexing were conducted within the 2θ range of 5-90° using HighScore Plus 3.0 software. The surface morphology of the nanomaterials was investigated using scanning electron microscopy (SEM) coupled with energy dispersive X-ray (EDX) analysis, employing a JEOL JSM 7100F instrument and INCA software. Fourier-transform infrared (FTIR) spectroscopy, employing a Perkin Elmer GXFTIR spectrometer and PFSPRO software, was utilized to examine functional groups within the wavenumber range of 400 - 4000 cm<sup>-1</sup> using the KBr pellet technique. X-ray photoelectron spectroscopy (XPS) was employed to analyze surface chemistry, with data analyzed using XPS software. Inductively coupled plasma mass spectrometry (ICP-MS), utilizing a Thermofisher Scientific instrument (model no-ICAPRQ) and Qtegra ISDS software (version 2.8.3170.309), was employed for determining the concentration of arsenic ions. The concentration of fluoride was measured utilizing a specialized ion sensor electrode designed for selective detection. To mitigate interference from other ions, samples were treated with TISAB I buffer solution containing CDTA.

#### ***S2. Batch adsorption experiments***

The laboratory scale experiments of batch adsorption involved utilizing freshly prepared As(V), As(III) and F<sup>-</sup> ions solution (50 ml), wherein various parameters were systematically varied. The different concentrations of As(V), As(III) and F<sup>-</sup> ions solutions were

achieved by diluting a specific quantity of a prepared stock solution with a concentration of 1000 mgL<sup>-1</sup>. The batch adsorption experiments incorporated varying the parameters, including adsorbent dose ranging from 50 to 300 mgL<sup>-1</sup>, pH ranging from 3 to 10, concentration ranging from 0.05 to 0.25 mgL<sup>-1</sup> for As(V) and As(III), while 5 to 50 mgL<sup>-1</sup> for F<sup>-</sup> ions, and time ranging from 10 to 180 minutes. All the adsorption experiments of arsenic and fluoride were implemented as per the Table S1 and S2, respectively. The 10 ml of sample solution collected in the vial after adsorption experiment using nylon syringe filter (0.22 µm). The ion-selective electrode was used to evaluate the filtered fluoride supernatant. To prevent interference from other ions, the samples were treated with a TISAB I buffer solution containing CDTA. Although, the filtered arsenic solution was analysed by ICP-MS instruments. The performance of pAITMA adsorbent was examined by the amount of As (V), As(III), and F<sup>-</sup> ions adsorbed and equilibrium adsorption capacity.

### **S3. Adsorption kinetic models**

Adsorption kinetic models are mathematical expressions used to describe the rate at which adsorption processes occur over time. These models help in understanding and predicting the dynamic behavior of adsorption systems. The kinetics of As(V), As(III) and F<sup>-</sup> ions removal were investigated using three widely recognized empirical kinetic models viz. Pseudo first order model (Eq. 5), the Pseudo second order model (Eq. 6), and the Elovich model (Eq. 7) .

$$q_t = q_e \left(1 - e^{-k_f t}\right) \quad (5)$$

$$q_t = \frac{q_e^2 k_s t}{1 + q_e k_s t} \quad (6)$$

$$q_t = \frac{1}{\beta} \ln(\alpha\beta) + \frac{1}{\beta} \ln(t) \quad (7)$$

In this equation,  $q_t$  and  $q_e$  represent the amount of adsorbed As(V), As(III), and F<sup>-</sup> ions (mg g<sup>-1</sup>) at time  $t$  (min) and equilibrium, respectively. The rate constants of pseudo-first and pseudo-second order are represented by  $k_f$  (1/min) and  $k_s$  (1/min), respectively. Moreover,  $\alpha$  (mg g<sup>-1</sup> min) and  $\beta$  (g mg<sup>-1</sup>) are the constants for Elovich model.

### **S4. Adsorption isotherm models**

Adsorption isotherm models are mathematical representations that describe the distribution of adsorbate molecules onto adsorbent surfaces at equilibrium conditions. The experimental data were employed to analyse Langmuir (Eq. 8), Freundlich (Eq. 10), Dubinin-

Radushkevich (D-R) (Eq. 11) and Temkin (Eq.12) isotherm models. These isotherm models provide insights into the adsorption mechanism, surface properties, and the maximum adsorption capacity of the adsorbent AlTMA. The adsorption behavior may be described using a dimensionless equilibrium parameter (RL) (Eq. 9). The fitting experimental data to these models determine the best-fitting isotherm and extracted relevant parameters for a better understanding of the adsorption process.

$$q_e = \frac{k_L q_{max} C_e}{1 + k_L C_e} \quad (8)$$

$$R_L = \frac{1}{1 + k_L C_0} \quad (9)$$

$$q_e = k_F C_e^{1/n} \quad (10)$$

$$q_e = q_d \exp(-B_{DR} \varepsilon^2) \quad (11)$$

$$q_e = B \ln A + B \ln C_e \quad (12)$$

Where,  $q_e$  (mg/g) is the adsorbent-phase concentration of adsorbate at equilibrium,  $C_e$  (mgL<sup>-1</sup>) is the aqueous phase concentration of adsorbate at equilibrium,  $k_L$  is the constant relating to the binding site's affinity,  $q_{max}$  (mg g<sup>-1</sup>) is the maximum (F-/As)ions adsorption capacity per unit weight of pAlTMA at  $C_e$ . The constant  $k_F$  (mg g<sup>-1</sup>) represents the relative adsorption capacity of the adsorbent.  $1/n$  is the adsorption intensity and larger fractional values of  $1/n$  indicate that the system has strong adsorption forces.  $q_d$  (mg g<sup>-1</sup>) is the amount of Hg(II) ions adsorbed per unit doses,  $B_{DR}$  (mol/KJ)<sup>2</sup> is the sorption energy constant.

**Table S1** RSM-CCD output for As(V) and As(III) removal using AlTMA adsorbent

|     |     | Factor 1                | Factor 2 | Factor 3        | Factor 4 | Response 1         |                                 | Response 2       |                               |
|-----|-----|-------------------------|----------|-----------------|----------|--------------------|---------------------------------|------------------|-------------------------------|
| Std | Run | A:<br>Adsorbent<br>dose | B:pH     | C:Concentration | D:Time   | As(III)<br>removal | Predicted<br>As(III)<br>removal | As(V)<br>removal | Predicted<br>As(V)<br>removal |
|     |     | mg/L                    |          | mg/L            | min      | %                  | %                               | %                | %                             |
| 29  | 1   | 300                     | 6.5      | 0.15            | 95       | 94.2               | 94.20                           | 98.4             | 98.76                         |
| 2   | 2   | 50                      | 6.5      | 0.15            | 95       | 74                 | 74.47                           | 77.6             | 78.57                         |
| 13  | 3   | 300                     | 3        | 0.25            | 10       | 36.3               | 36.64                           | 48.2             | 45.41                         |
| 27  | 4   | 50                      | 10       | 0.25            | 10       | 23.4               | 25.21                           | 35.2             | 34.17                         |
| 26  | 5   | 175                     | 6.5      | 0.15            | 95       | 86.1               | 87.90                           | 94.5             | 91.76                         |
| 5   | 6   | 50                      | 3        | 0.25            | 10       | 33.9               | 31.73                           | 38.6             | 38.61                         |
| 24  | 7   | 175                     | 6.5      | 0.15            | 95       | 86.2               | 87.90                           | 94.4             | 91.76                         |

|    |    |     |     |      |     |      |       |      |        |
|----|----|-----|-----|------|-----|------|-------|------|--------|
| 19 | 8  | 300 | 3   | 0.05 | 10  | 76.2 | 73.17 | 79.5 | 78.06  |
| 12 | 9  | 175 | 6.5 | 0.15 | 95  | 89.6 | 87.90 | 90.8 | 91.76  |
| 15 | 10 | 50  | 3   | 0.05 | 10  | 58.4 | 59.73 | 64.6 | 64.89  |
| 30 | 11 | 175 | 10  | 0.15 | 95  | 77.2 | 73.19 | 81.8 | 80.04  |
| 7  | 12 | 300 | 3   | 0.05 | 180 | 96.3 | 97.11 | 99.2 | 100.43 |
| 9  | 13 | 50  | 10  | 0.05 | 10  | 53.7 | 51.19 | 67.5 | 65.37  |
| 28 | 14 | 50  | 10  | 0.25 | 180 | 57.8 | 58.09 | 58.1 | 59.01  |
| 17 | 15 | 175 | 6.5 | 0.15 | 10  | 57.9 | 60.73 | 63.8 | 69.22  |
| 6  | 16 | 175 | 3   | 0.15 | 95  | 72.4 | 76.89 | 79.8 | 82.90  |
| 18 | 17 | 175 | 6.5 | 0.15 | 95  | 90.4 | 87.90 | 93.5 | 91.76  |
| 23 | 18 | 300 | 10  | 0.25 | 180 | 82.8 | 84.10 | 86.3 | 86.21  |
| 1  | 19 | 300 | 10  | 0.5  | 10  | 58.6 | 61.20 | 73.8 | 74.07  |
| 4  | 20 | 175 | 6.5 | 0.15 | 95  | 90.1 | 87.90 | 90.8 | 91.76  |
| 20 | 21 | 50  | 10  | 0.05 | 180 | 59.4 | 61.69 | 62.6 | 65.58  |
| 21 | 22 | 50  | 3   | 0.25 | 180 | 53.5 | 53.53 | 60.8 | 60.73  |
| 3  | 23 | 50  | 3   | 0.05 | 180 | 60.7 | 59.15 | 64.3 | 62.37  |
| 14 | 24 | 175 | 6.5 | 0.25 | 95  | 79.4 | 79.25 | 80.7 | 80.76  |
| 8  | 25 | 175 | 6.5 | 0.15 | 95  | 86.4 | 87.90 | 90.6 | 91.76  |
| 16 | 26 | 175 | 6.5 | 0.05 | 95  | 98.7 | 99.32 | 99.1 | 100.37 |
| 25 | 27 | 300 | 10  | 0.05 | 180 | 96.8 | 96.23 | 99.7 | 99.16  |
| 11 | 28 | 175 | 6.5 | 0.15 | 180 | 91.5 | 89.14 | 96.9 | 92.82  |
| 10 | 29 | 300 | 10  | 0.25 | 10  | 27.9 | 26.70 | 35.1 | 36.50  |
| 22 | 30 | 300 | 3   | 0.25 | 180 | 83.2 | 82.96 | 90.8 | 92.40  |

**Table S2** RSM-CCD output for fluoride removal using AlTMA adsorbent

|     |     | Factor 1         | Factor 2 | Factor 3        | Factor 4 | Response 1 |                     |
|-----|-----|------------------|----------|-----------------|----------|------------|---------------------|
| Std | Run | A:Adsorbent dose | B:pH     | C:Concentration | D:Time   | F removal  | Predicted F removal |
|     |     | mg/L             |          | mg/L            | min      | %          | %                   |
| 23  | 1   | 50               | 6.5      | 27.5            | 95       | 78.9       | 75.25               |
| 5   | 2   | 50               | 10       | 50              | 10       | 19.1       | 20.15               |
| 26  | 3   | 300              | 3        | 50              | 10       | 29.6       | 32.25               |
| 22  | 4   | 300              | 3        | 5               | 10       | 54.9       | 52.07               |
| 24  | 5   | 300              | 10       | 5               | 180      | 93.1       | 94.13               |
| 1   | 6   | 175              | 6.5      | 5               | 95       | 92.9       | 90.38               |
| 9   | 7   | 175              | 6.5      | 27.5            | 95       | 74.1       | 73.70               |
| 13  | 8   | 175              | 6.5      | 27.5            | 95       | 73.4       | 73.70               |
| 30  | 9   | 300              | 6.5      | 27.5            | 95       | 80.7       | 81.52               |
| 11  | 10  | 175              | 10       | 27.5            | 95       | 64.8       | 62.12               |
| 4   | 11  | 300              | 3        | 5               | 180      | 98.6       | 98.43               |
| 3   | 12  | 300              | 10       | 50              | 180      | 68.1       | 67.30               |
| 20  | 13  | 50               | 3        | 50              | 10       | 29.9       | 28.70               |
| 18  | 14  | 300              | 3        | 50              | 180      | 76.6       | 75.91               |
| 19  | 15  | 300              | 10       | 5               | 10       | 43.4       | 45.51               |
| 29  | 16  | 175              | 6.5      | 27.5            | 10       | 40.9       | 39.04               |
| 6   | 17  | 50               | 3        | 50              | 180      | 58.3       | 57.07               |

|    |    |     |     |      |     |      |       |
|----|----|-----|-----|------|-----|------|-------|
| 16 | 18 | 50  | 10  | 50   | 180 | 48.1 | 50.76 |
| 15 | 19 | 175 | 6.5 | 50   | 95  | 63.6 | 63.28 |
| 17 | 20 | 50  | 3   | 5    | 180 | 85.2 | 87.14 |
| 28 | 21 | 50  | 10  | 5    | 10  | 51.3 | 51.82 |
| 2  | 22 | 175 | 6.5 | 27.5 | 180 | 78.5 | 77.53 |
| 21 | 23 | 50  | 3   | 5    | 10  | 54.4 | 56.08 |
| 7  | 24 | 175 | 6.5 | 27.5 | 95  | 70.1 | 73.70 |
| 12 | 25 | 300 | 10  | 50   | 10  | 23.5 | 21.39 |
| 25 | 26 | 175 | 6.5 | 27.5 | 95  | 70.4 | 73.70 |
| 8  | 27 | 175 | 6.5 | 27.5 | 95  | 71.1 | 73.70 |
| 10 | 28 | 50  | 10  | 5    | 180 | 86.9 | 85.13 |
| 14 | 29 | 175 | 3   | 27.5 | 95  | 68.7 | 68.55 |
| 27 | 30 | 175 | 6.5 | 27.5 | 95  | 74.6 | 73.70 |

**Table S3.** ANOVA analysis for the CCD model for As(V), As(III) and F<sup>-</sup> ions

|                | Source           | Sum of Squares | df | Mean Square | F-value | p-value  |                 |
|----------------|------------------|----------------|----|-------------|---------|----------|-----------------|
|                | <b>Model</b>     | 11226.32       | 14 | 801.88      | 102.45  | < 0.0001 | significant     |
|                | A-Dose           | 1834.16        | 1  | 1834.16     | 234.33  | < 0.0001 |                 |
|                | B-pH             | 36.69          | 1  | 36.69       | 4.69    | 0.0469   |                 |
|                | C-Conc           | 1730.68        | 1  | 1730.68     | 221.11  | < 0.0001 |                 |
|                | D-Time           | 2506.32        | 1  | 2506.32     | 320.21  | < 0.0001 |                 |
|                | AB               | 20.03          | 1  | 20.03       | 2.56    | 0.1306   |                 |
| <b>As (V)</b>  | AC               | 40.64          | 1  | 40.64       | 5.19    | 0.0377   |                 |
|                | AD               | 618.77         | 1  | 618.77      | 79.05   | < 0.0001 |                 |
|                | BC               | 24.26          | 1  | 24.26       | 3.10    | 0.0987   |                 |
|                | BD               | 7.43           | 1  | 7.43        | 0.9487  | 0.3455   |                 |
|                | CD               | 606.39         | 1  | 606.39      | 77.47   | < 0.0001 |                 |
|                | A <sup>2</sup>   | 24.81          | 1  | 24.81       | 3.17    | 0.0952   |                 |
|                | B <sup>2</sup>   | 274.59         | 1  | 274.59      | 35.08   | < 0.0001 |                 |
|                | C <sup>2</sup>   | 3.70           | 1  | 3.70        | 0.4725  | 0.5023   |                 |
|                | D <sup>2</sup>   | 299.12         | 1  | 299.12      | 38.22   | < 0.0001 |                 |
|                | <b>Residual</b>  | 117.41         | 15 | 7.83        |         |          |                 |
|                | Lack of Fit      | 99.43          | 10 | 9.94        | 2.77    | 0.1365   | not significant |
|                | Pure Error       | 17.97          | 5  | 3.59        |         |          |                 |
|                | <b>Cor Total</b> | 11343.73       | 29 |             |         |          |                 |
|                |                  |                |    |             |         |          |                 |
|                | <b>Model</b>     | 13341.19       | 14 | 952.94      | 122.30  | < 0.0001 | significant     |
|                | A-Dose           | 1750.35        | 1  | 1750.35     | 224.64  | < 0.0001 |                 |
|                | B-pH             | 61.60          | 1  | 61.60       | 7.91    | 0.0131   |                 |
|                | C-Conc           | 1812.02        | 1  | 1812.02     | 232.56  | < 0.0001 |                 |
|                | D-Time           | 3632.36        | 1  | 3632.36     | 466.19  | < 0.0001 |                 |
|                | AB               | 11.73          | 1  | 11.73       | 1.51    | 0.2387   |                 |
| <b>As(III)</b> | AC               | 72.68          | 1  | 72.68       | 9.33    | 0.0080   |                 |
|                | AD               | 601.48         | 1  | 601.48      | 77.19   | < 0.0001 |                 |
|                | BC               | 4.10           | 1  | 4.10        | 0.5263  | 0.4793   |                 |

|                      |                  |          |    |         |        |          |                 |
|----------------------|------------------|----------|----|---------|--------|----------|-----------------|
|                      | BD               | 122.66   | 1  | 122.66  | 15.74  | 0.0012   |                 |
|                      | CD               | 500.64   | 1  | 500.64  | 64.25  | < 0.0001 |                 |
|                      | A <sup>2</sup>   | 32.86    | 1  | 32.86   | 4.22   | 0.0579   |                 |
|                      | B <sup>2</sup>   | 428.58   | 1  | 428.58  | 55.00  | < 0.0001 |                 |
|                      | C <sup>2</sup>   | 5.00     | 1  | 5.00    | 0.6412 | 0.4358   |                 |
|                      | D <sup>2</sup>   | 435.27   | 1  | 435.27  | 55.86  | < 0.0001 |                 |
|                      | <b>Residual</b>  | 116.87   | 15 | 7.79    |        |          |                 |
|                      | Lack of Fit      | 94.84    | 10 | 9.48    | 2.15   | 0.2057   | not significant |
|                      | Pure Error       | 22.03    | 5  | 4.41    |        |          |                 |
|                      | <b>Cor Total</b> | 13458.06 | 29 |         |        |          |                 |
|                      |                  |          |    |         |        |          |                 |
|                      | <b>Model</b>     | 12664.54 | 14 | 904.61  | 122.35 | < 0.0001 | significant     |
|                      | A-Dose           | 176.72   | 1  | 176.72  | 23.90  | 0.0002   |                 |
|                      | B-pH             | 186.25   | 1  | 186.25  | 25.19  | 0.0002   |                 |
|                      | C-Conc           | 3304.85  | 1  | 3304.85 | 446.97 | < 0.0001 |                 |
|                      | D-Time           | 6666.28  | 1  | 6666.28 | 901.59 | < 0.0001 |                 |
|                      | AB               | 5.29     | 1  | 5.29    | 0.7155 | 0.4109   |                 |
|                      | AC               | 57.00    | 1  | 57.00   | 7.71   | 0.0141   |                 |
|                      | AD               | 234.09   | 1  | 234.09  | 31.66  | < 0.0001 |                 |
| <b>F<sup>-</sup></b> | BC               | 18.49    | 1  | 18.49   | 2.50   | 0.1346   |                 |
|                      | BD               | 5.06     | 1  | 5.06    | 0.6847 | 0.4209   |                 |
|                      | CD               | 7.29     | 1  | 7.29    | 0.9859 | 0.3365   |                 |
|                      | A <sup>2</sup>   | 56.87    | 1  | 56.87   | 7.69   | 0.0142   |                 |
|                      | B <sup>2</sup>   | 181.29   | 1  | 181.29  | 24.52  | 0.0002   |                 |
|                      | C <sup>2</sup>   | 25.47    | 1  | 25.47   | 3.44   | 0.0832   |                 |
|                      | D <sup>2</sup>   | 615.65   | 1  | 615.65  | 83.26  | < 0.0001 |                 |
|                      | <b>Residual</b>  | 110.91   | 15 | 7.39    |        |          |                 |
|                      | Lack of Fit      | 91.28    | 10 | 9.13    | 2.33   | 0.1821   | not significant |
|                      | Pure Error       | 19.63    | 5  | 3.93    |        |          |                 |
|                      | <b>Cor Total</b> | 12775.45 | 29 |         |        |          |                 |

### 3.3. Adsorption Study

#### 3.3.1 Batch scale adsorption with single ions

##### **S5.** Effect of pH and Point of zero charge ( $pH_{pzc}$ )

The influence of solution pH on adsorption efficacy was examined by changing the pH of the solution from acidic to alkaline i.e.,  $2\pm0.2$ – $10\pm0.2$ , at set experimental environments, such as dose of pALTMA:  $0.250\text{ g L}^{-1}$ , rpm: 150, contact time: 120min, temp.:  $30\pm2.0^\circ\text{C}$ , and  $F^-$ :  $10\text{ mg L}^{-1}$ .  $pH_{pzc}$  affects a number of features of suspension materials, including stability, interface with electrolytes, and ion exchange capacity. It is associated to the surface charge and pH of the substance. The ion-selective electrode was used to evaluate the filtered fluoride supernatant. The drift method was used to calculate  $pH_{pzc}$  of pALTMA.

### ***S6. Effect of co-existing ions***

It is observed that numerous interfering anions are present in natural ground or surface water such as phosphate ( $\text{PO}_4^{3-}$ ), sulfate ( $\text{SO}_4^{2-}$ ), bicarbonate ( $\text{HCO}_3^-$ ), nitrate ( $\text{NO}_3^-$ ), and chloride ( $\text{Cl}^-$ ). It is observed that presence of these co-existing anions in water may impede the adsorption of arsenic and fluoride. Hence, in order to investigate the impact of co-existing anions on the elimination of fluoride and arsenic with pAITMA, a few anions such as  $\text{Cl}^-$ ,  $\text{NO}_3^-$ ,  $\text{SO}_4^{2-}$ ,  $\text{HCO}_3^-$  and  $\text{PO}_4^{3-}$  are chosen separately. Coexisting anions concentration were maintained at  $100 \text{ mg L}^{-1}$  with fluoride at  $10 \text{ mg L}^{-1}$ , and arsenic at  $0.2 \text{ mg L}^{-1}$  in the solution.

### ***S7. 3.3.2 Binary phase adsorption study***

The experiments on binary adsorption were carried out at varying experimental i.e., dose of pAITMA, Feed concentration and pH of the medium

#### ***3.3.2.1 Effects of adsorbent's dose and feed concentration***

The effect of varying dose of pAITMA and feed concentration of arsenic and fluoride were employed to assess its performance in a mixed simulated solution (As:  $0.2 \text{ mg L}^{-1}$ , +F:  $10 \text{ mg L}^{-1}$ ), while keeping other parameter fixed (pH:  $7.0 \pm 0.2$ , temp.:  $25 \pm 2.0^\circ\text{C}$  agitation speed rpm: 250 rpm, time: 210 minutes). The results suggest a synergistic interaction between fluoride and arsenic during the adsorption process in binary phase. In the first experiment, the performance was examined by varying dose of pAITMA, in the fixed concentration binary solution ( $\text{F}^- + \text{As}$ ), and another parameter were also constant. It was observed that as the dose of pAITMA increased from  $0.05$  to  $0.15 \text{ g L}^{-1}$ , the arsenic and fluoride removal efficiencies rose sharply from 71.25% to 96.34% and 78.35% to 98.21% respectively. Upon further increasing the dose to  $0.31 \text{ g L}^{-1}$ , removal efficiencies reached 98.21% and 96.34% for fluoride and arsenic respectively [Fig. S1 (a,b)].

Next, set of experiment, the impact of feed concentration on the adsorption behaviour of arsenic and fluoride ions using pAITMA was systematically investigated. Thus, the concentration of one ion was varied; while keeping the other constant to assess their interactive influence on the adsorbent's performance. Results revealed that with increasing concentrations of arsenic from  $200$ – $5000 \text{ } \mu\text{g L}^{-1}$  with fixed concentration of fluoride ( $10 \text{ mg L}^{-1}$ ) led to a substantial enhancement in arsenic removal efficiency, from 57.32% to 96.31%. While with increasing concentrations of fluoride from  $5$ – $50 \text{ mg L}^{-1}$ , with fixed concentration of arsenic ( $200 \text{ } \mu\text{g L}^{-1}$ ), the fluoride removal efficiency increased from 70.34% to 99.1%. The maximum adsorption capacities ( $q_{e\_max}$ ) for fluoride and arsenic were observed as  $31.75 \text{ mg g}^{-1}$  and  $0.62 \text{ mg g}^{-1}$ , respectively in binary phase medium. [Fig. S2 (a, b)].

These findings affirm pAITMA's robust capacity to effectively remove both fluoride and arsenic, achieving compliance with WHO drinking water standards ( $F^-: \leq 1.5 \text{ mg} \cdot \text{L}^{-1}$ ;  $As: \leq 10 \text{ } \mu\text{g} \cdot \text{L}^{-1}$ ). Moreover, the results suggest a synergistic interaction between fluoride and arsenic during the adsorption process. Fluoride exhibited a more pronounced inhibitory effect on arsenic adsorption, likely due to increased ionic strength and competitive interactions for active sites. In contrast, the presence of arsenic notably enhanced fluoride removal, particularly at elevated arsenic concentrations, highlighting a complex interplay that influences adsorption dynamics.

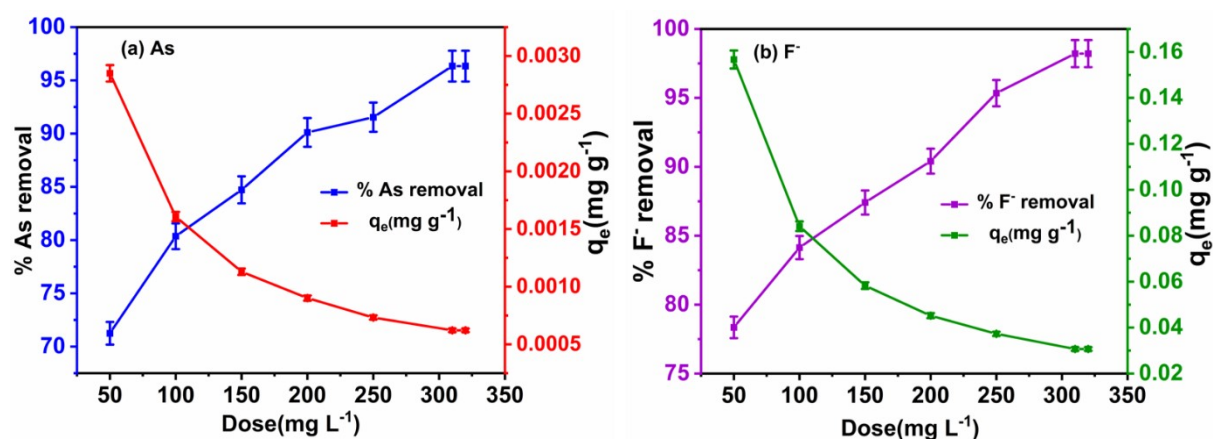

**Fig. S1** Effect of dose on performance efficacy of pAITMA (a) arsenic (b) fluoride with fixed binary phase ( $As: 0.2 \text{ mg L}^{-1} + F^-: 10.0 \text{ mg L}^{-1}$ ), agitation time: 210 minutes, agitation rate: 250 rpm, pH:  $7.0 \pm 0.2$ , adsorption temp.:  $25 \pm 2.0^\circ\text{C}$

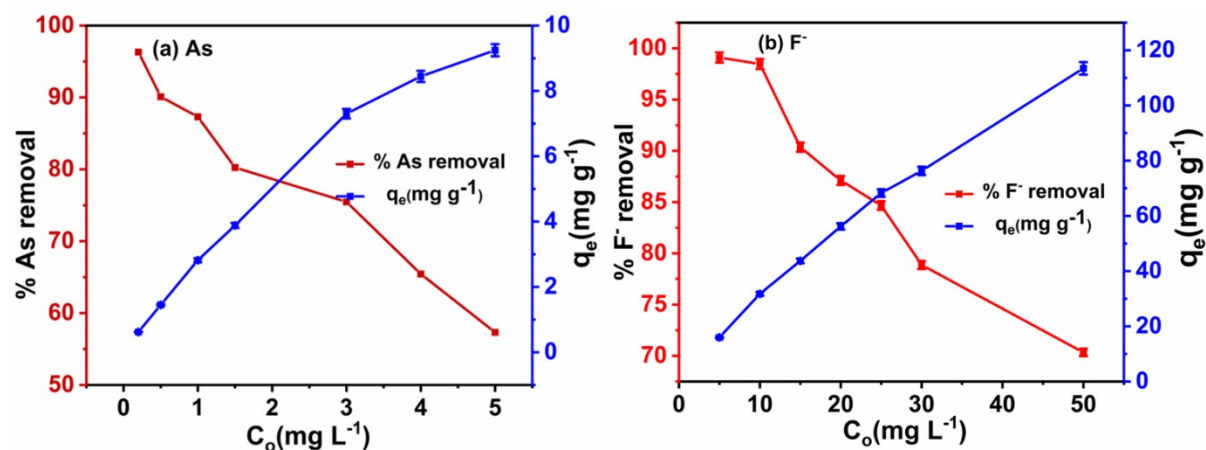

**Fig. S2** Effect of concentration on performance efficacy of pAITMA (a) arsenic (b) fluoride in binary phase with fixed quantity pAITMA:  $0.31 \text{ g L}^{-1}$ , agitation time: 210 minutes, agitation rate: 250 rpm, pH:  $7.0 \pm 0.2$ , adsorption temp.:  $25 \pm 2.0^\circ\text{C}$

### *S8. Regeneration, recapture and safety assessment*



Any material, which is able to bring down the operating expenses, whereas minimising maintenance costs would be ideal for field deployment. As a result, adsorption-desorption studies were conducted to determine the reusability of the produced adsorbent. After testing different eluting agents to desorb arsenic and fluoride under certain experimental settings, the eluting agent with the highest desorption effectiveness for the targeted ions was selected for the present work.

For safety assessment, the utilised pAITMA from adsorption studies was investigated for TCLP test to establish if the spent spherical material was inert or dangerous about the leachability of Al in water. Hence, treated water samples were analysed by ICP-MS analysis to examine the presence of these ions in water samples.

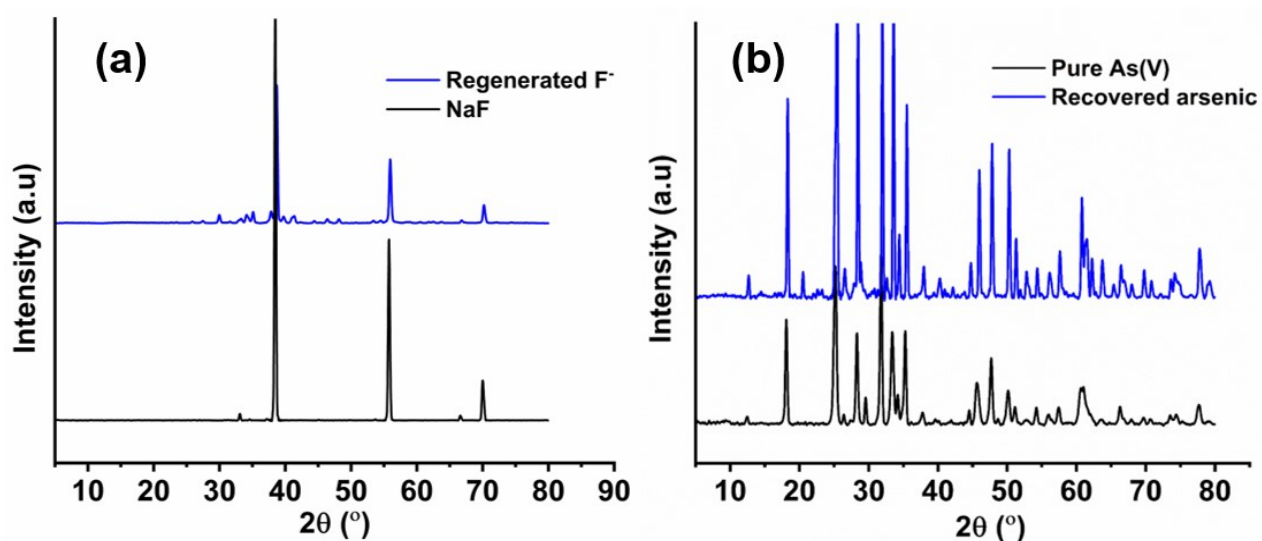

**Fig. S3** XRD spectra of recovered salt of (a) fluoride and (b) arsenic.

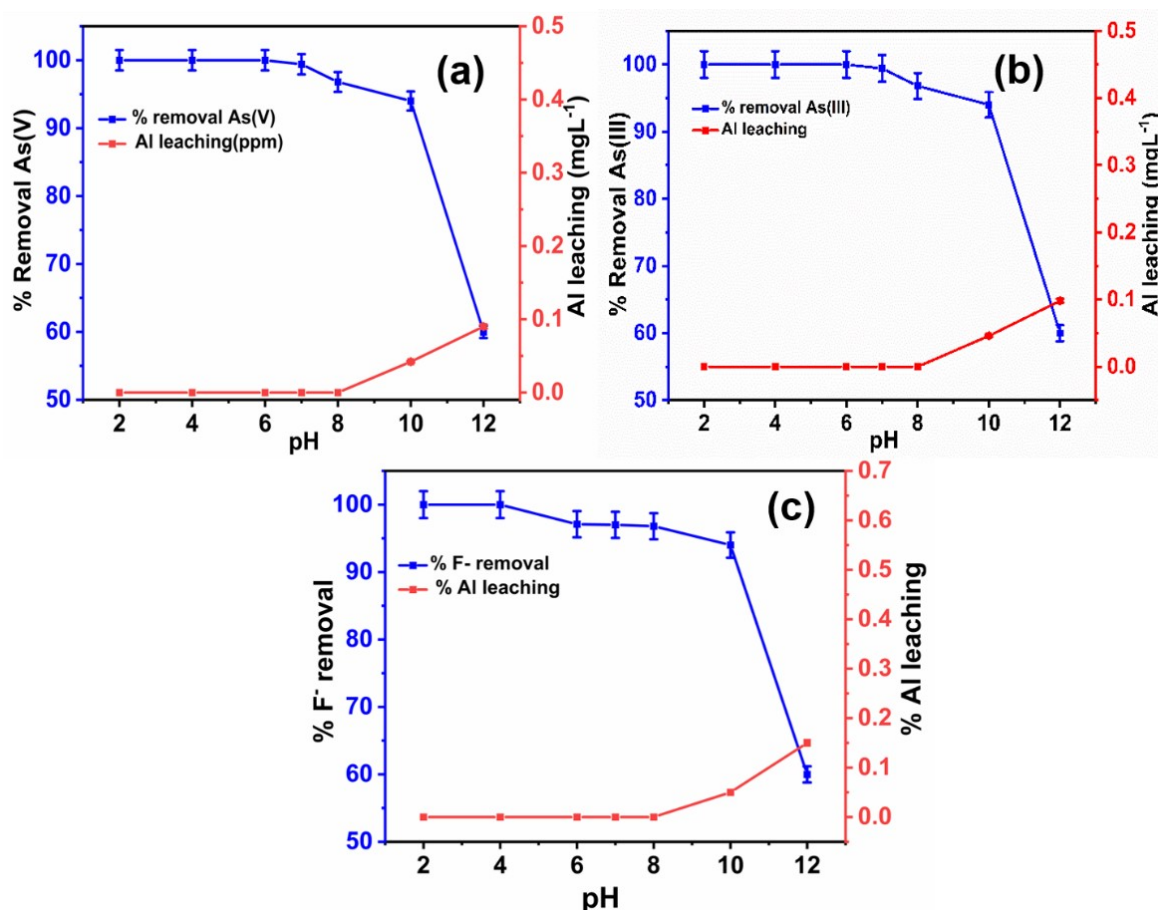

**Fig. S4** Leaching study of pAlTMA at varying pH, Feed As(V)/As(III) : 0.175 mg L<sup>-1</sup> , F<sup>-</sup> : 10.5 mg L<sup>-1</sup>, temp.: 298 K, pAlTMA dose: 298 mg L<sup>-1</sup> for arsenic and 287 mg L<sup>-1</sup> for fluoride.

**Table S4** Kinetics data of AlTMA adsorbent for As(V), As(III) and F<sup>-</sup> ions

| Temperature (K) | Pollutants     | Parameters                    |                                |        |                               |                                |        |                        |                   |        |
|-----------------|----------------|-------------------------------|--------------------------------|--------|-------------------------------|--------------------------------|--------|------------------------|-------------------|--------|
|                 |                |                               | PFO                            |        |                               | PSO                            |        |                        | Elovich           |        |
|                 |                | $k_f$<br>(min <sup>-1</sup> ) | $q_e$<br>(mg g <sup>-1</sup> ) | $R^2$  | $k_s$<br>(min <sup>-1</sup> ) | $q_e$<br>(mg g <sup>-1</sup> ) | $R^2$  | $\alpha$<br>(mg/g min) | $\beta$<br>(g/mg) | $R^2$  |
| 288             | As(V)          | 0.0178                        | 0.4129                         | 0.9564 | 0.0777                        | 0.6243                         | 0.9970 | 0.0681                 | 8.7260            | 0.9917 |
|                 | As(III)        | 0.0219                        | 0.6633                         | 0.9493 | 0.0380                        | 0.6585                         | 0.9991 | 0.0379                 | 7.2463            | 0.9966 |
|                 | F <sup>-</sup> | 0.0196                        | 23.396                         | 0.9441 | 0.0016                        | 37.921                         | 0.9969 | 32.008                 | 0.2045            | 0.9851 |
| 298             | As(V)          | 0.0172                        | 0.4580                         | 0.9363 | 0.0590                        | 0.6124                         | 0.9960 | 0.0689                 | 8.8967            | 0.9906 |
|                 | As(III)        | 0.023                         | 0.7685                         | 0.9500 | 0.0264                        | 0.6802                         | 0.9979 | 0.0275                 | 6.7796            | 0.9921 |
|                 | F <sup>-</sup> | 0.0191                        | 28.078                         | 0.8208 | 0.0013                        | 37.993                         | 0.9934 | 20.616                 | 0.1955            | 0.9725 |

|            |                      |        |        |        |        |        |        |        |        |        |
|------------|----------------------|--------|--------|--------|--------|--------|--------|--------|--------|--------|
|            | <b>As(V)</b>         | 0.0190 | 0.5983 | 0.8431 | 0.0375 | 0.6284 | 0.9951 | 0.0362 | 7.7345 | 0.9916 |
| <b>308</b> | <b>As(III)</b>       | 0.0193 | 0.6399 | 0.9626 | 0.0210 | 0.6855 | 0.9979 | 0.0233 | 6.8166 | 0.9941 |
|            | <b>F<sup>-</sup></b> | 0.0156 | 26.509 | 0.9450 | 0.0009 | 38.476 | 0.9912 | 7.6743 | 0.1644 | 0.9720 |
|            | <b>As(V)</b>         | 0.0184 | 0.6125 | 0.8010 | 0.0324 | 0.6240 | 0.9908 | 0.0309 | 7.7459 | 0.9890 |
| <b>318</b> | <b>As(III)</b>       | 0.0182 | 0.6150 | 0.9368 | 0.0182 | 0.6773 | 0.9943 | 0.0205 | 7.0521 | 0.9953 |
|            | <b>F<sup>-</sup></b> | 0.0143 | 27.796 | 0.9293 | 0.0008 | 38.729 | 0.9872 | 4.9707 | 0.1517 | 0.9736 |

**Table S5** Arsenic containing field water analysis (before and after adsorption)

| Parameter                     | Unit                  | Feed water | Treated Water |
|-------------------------------|-----------------------|------------|---------------|
| TDS                           | (mg L <sup>-1</sup> ) | 631.6±10   | 554.4±10      |
| pH                            |                       | 7.57±0.1   | 7.40±0.1      |
| Turbidity                     | (NTU)                 | 4.40±0.15  | 1.40±0.15     |
| As(V)                         | (mg L <sup>-1</sup> ) | 0.10±0.005 | 0.002±0.005   |
| Fe <sup>3+</sup>              | (mg L <sup>-1</sup> ) | 0.00±0.03  | 0.00±0.03     |
| Na <sup>+</sup>               | (mg L <sup>-1</sup> ) | 172±7.0    | 167±7.0       |
| K <sup>+</sup>                | (mg L <sup>-1</sup> ) | 16.7±0.8   | 13.9±0.8      |
| Mg <sup>2+</sup>              | (mg L <sup>-1</sup> ) | 55.80±3.0  | 44.60±3.0     |
| Ca <sup>2+</sup>              | (mg L <sup>-1</sup> ) | 12.50±0.6  | 8.17±0.6      |
| Cl <sup>-</sup>               | (mg L <sup>-1</sup> ) | 150.4±7.0  | 142.4±7.0     |
| HCO <sub>3</sub> <sup>-</sup> | (mg L <sup>-1</sup> ) | 72.4±3.0   | 64.1±3.0      |
| SO <sub>4</sub> <sup>2-</sup> | (mg L <sup>-1</sup> ) | 59.40±3.0  | 59.70±3.0     |
| PO <sub>4</sub> <sup>3-</sup> | (mg L <sup>-1</sup> ) | 44.44±3.0  | 38.27±3.0     |
| NO <sub>3</sub> <sup>-</sup>  | (mg L <sup>-1</sup> ) | 33.41±3.0  | 25.27±3.0     |

**Table S6** Fluoride containing field water analysis (before and after adsorption)

| Parameter        | Unit                  | Feed water | Treated Water |
|------------------|-----------------------|------------|---------------|
| TDS              | (mg L <sup>-1</sup> ) | 1062±10    | 867.4±10      |
| pH               |                       | 7.01±0.1   | 7.50±0.1      |
| Turbidity        | (NTU)                 | 5.6±0.15   | 1.40±0.15     |
| Na <sup>+</sup>  | (mg L <sup>-1</sup> ) | 331±10     | 325±10        |
| K <sup>+</sup>   | (mg L <sup>-1</sup> ) | 37±3.0     | 32±3.0        |
| Ca <sup>2+</sup> | (mg L <sup>-1</sup> ) | 23±2.5     | 11±2.5        |
| Fe <sup>3+</sup> | (mg L <sup>-1</sup> ) | 0±0.001    | 0±0.001       |

|                               |                       |          |           |
|-------------------------------|-----------------------|----------|-----------|
| Hg <sup>2+</sup>              | (mg L <sup>-1</sup> ) | 0±0.001  | 0±0.001   |
| Pb <sup>2+</sup>              | (mg L <sup>-1</sup> ) | 0±0.001  | 0±0.001   |
| HCO <sub>3</sub> <sup>-</sup> | (mg L <sup>-1</sup> ) | 178±7.0  | 160±7.0   |
| SO <sub>4</sub> <sup>2-</sup> | (mg L <sup>-1</sup> ) | 85±5.0   | 74±5.0    |
| Cl <sup>-</sup>               | (mg L <sup>-1</sup> ) | 287±7.0  | 267±7.0   |
| PO <sub>4</sub> <sup>3-</sup> | (mg L <sup>-1</sup> ) | 69±3.0   | 57±3.0    |
| F <sup>-</sup>                | (mg L <sup>-1</sup> ) | 7.1±0.15 | 0.24±0.15 |
